# Supplementary material
Source: PubMed Central journal article supplement (PMC8678332)

**Supplemental Figure 1.** Flow diagram for study selection.

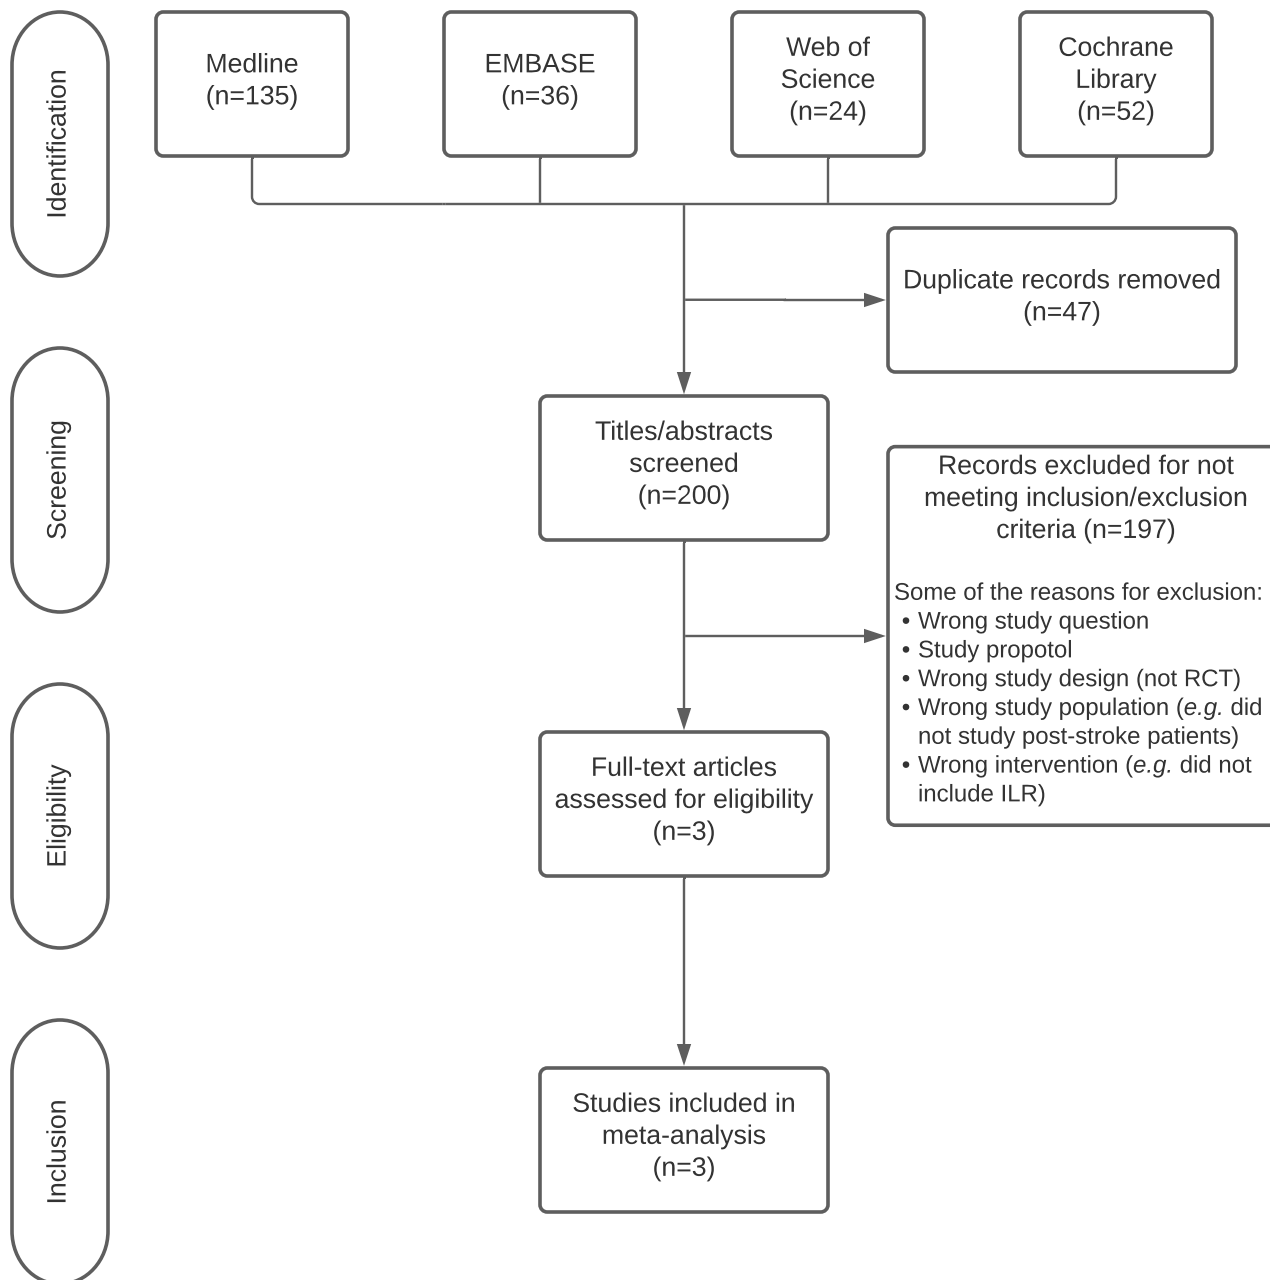

Supplement: NIHMS1743368-supplement-Supplemental_Figure.pdf [file NIHMS1743368-supplement-Supplemental_Figure.pdf]
